# Supplementary material
Source: publisher figshare collection journal article supplement (https://tandf.figshare.com/ndownloader/files/13005152)
Supplement: Supplementary file 1 [file 13005152]

**Cationic-anionic fluorinated surfactant mixtures based on short fluorocarbon chains as potential aqueous film-forming foam**

**Figure S1.** Surface tension curve of C3F7COONa at 25 °C
